# Supplementary material for: Dynamic Contrast Microscopic Optical Coherence Tomography As a Novel Method for Assessing Corneal Epithelium During Exposure to Benzalkonium Chloride
Source: PubMed Central journal article supplement (PMC9145126; doi:10.1167/tvst.11.5.28), 2022-05-27
Supplement: tvst-11-5-28_s002.pdf [file tvst-11-5-28_s002.pdf]

The coefficient of variation was computed by the ratio of the standard deviation of the average of all eyes measurement over for each time point in the control group, over the average of all the measures over time, and multiplying by 100. The coefficient of repeatability was calculated by first computing the within subject standard deviation over time, multiplying this by 2.77, then taking the average of all six control eyes.

Table S1. Measures of reproducibility in control eye data

|                      | Coefficient of Variation (CV)  | Coefficient of Repeatability (CR)                |
|----------------------|--------------------------------|--------------------------------------------------|
| Formula              | $\frac{\sigma}{\bar{x}} * 100$ | within-subject standard deviation ( $S_w$ )*2.77 |
| Epithelium Thickness | 4.8 ± 1.4                      | 5.7µm ± 1.7µm                                    |
| Stroma Thickness     | 7.1 ± 3.6                      | 20.4µm ± 12.2µm                                  |
| Basal Motility       | 2.098 ± 0.374                  | 0.025 ± 0.005                                    |
| Total Motility       | 3.109 ± 0.593                  | 0.033 ± 0.006                                    |
| Peak Hue Basal       | 13 ± 5                         | 15 ± 5                                           |
| Primary Hue Total    | 11 ± 5                         | 12 ± 5                                           |
| Secondary Hue Total  | 5 ± 2                          | 32 ± 13                                          |
